# Supplementary material
Source: MDPI journal article supplement (https://www.mdpi.com/2073-4441/12/11/3216)
Supplement: s1 [file s1]

# Supplementary Information

## Structural diversity in early-stage biofilm formation on microplastics depends on environmental medium and polymer properties

Anja FRM Ramsperger <sup>1,4</sup>, Anja C Stellwag <sup>1</sup>, Anja Caspari<sup>2</sup>, Andreas Fery<sup>2</sup>, Tillmann Lueders<sup>3</sup>, Holger Kress <sup>4</sup>, Martin GJ Löder <sup>1</sup>, and Christian Laforsch <sup>1,\*</sup>

<sup>1</sup> Animal Ecology I, University of Bayreuth, Germany;

<sup>2</sup> Institut für Physikalische Chemie und Physik der Polymere, Leibniz Institut für Polymerforschung Dresden e.V., Germany;

<sup>3</sup> Ecological Microbiology, University of Bayreuth, Germany;

<sup>4</sup> Biological Physics, University of Bayreuth, Germany;

\* Correspondence: Christian.laforsch@uni-bayreuth.de;

Content:

Figures S1- S4

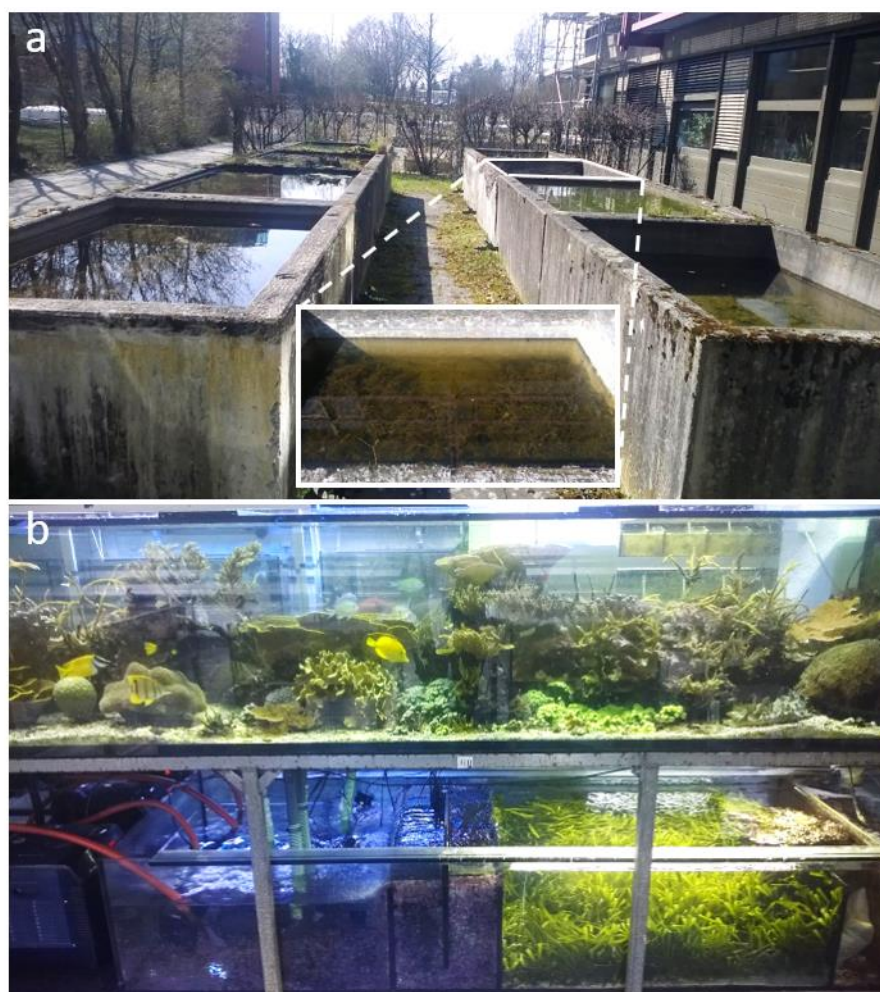

**Figure S1: Photographs of the sampling sites for the incubation media.** a) Freshwater from an artificial pond (49°55'44.1" N; 11°34'60.0" E) and b) saltwater obtained from a marine aquaria facility. Photo Credit: Anja C. Stellwag, University of Bayreuth.

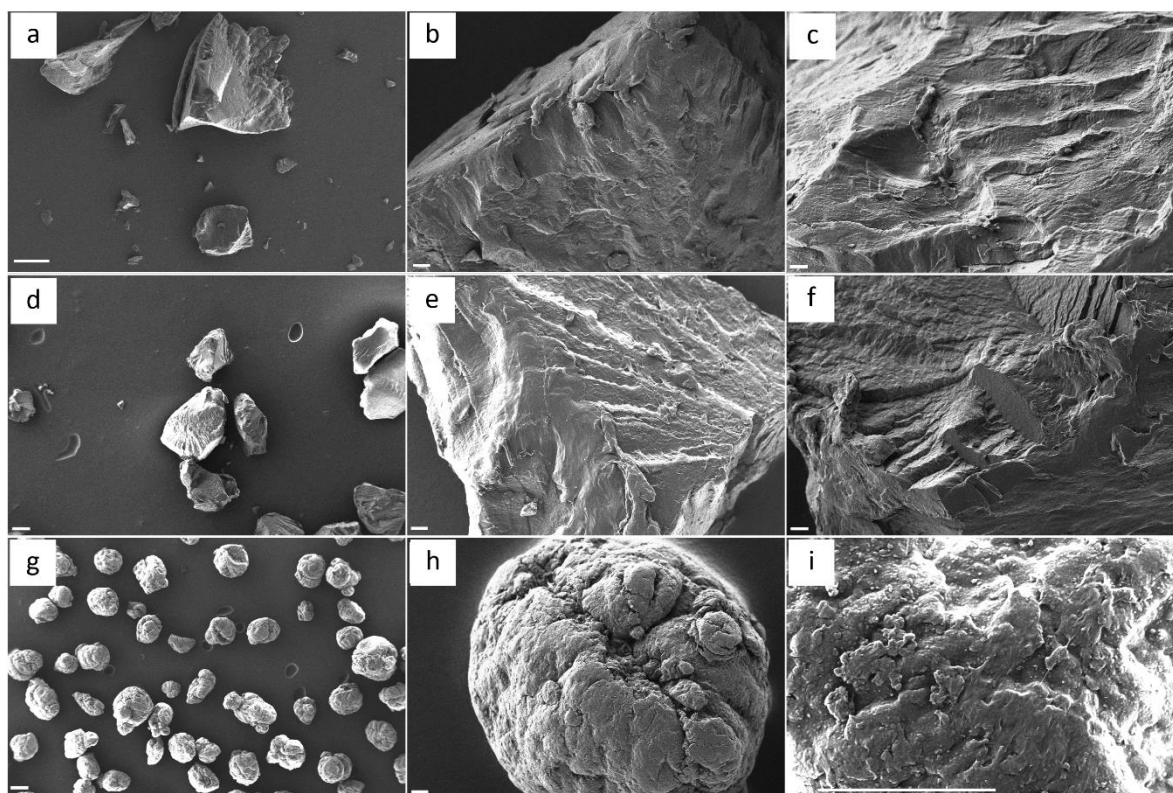

**Figure S2: Scanning electron microscopy images of the three polymer raw materials.** Surfaces of the PA fragments are shown from a-c, PET surfaces from d-f and the slightly rougher surface of PVC from g-i. Scale bars: a, d, g = 100μm, b, c, e, f, h, i = 10μm.

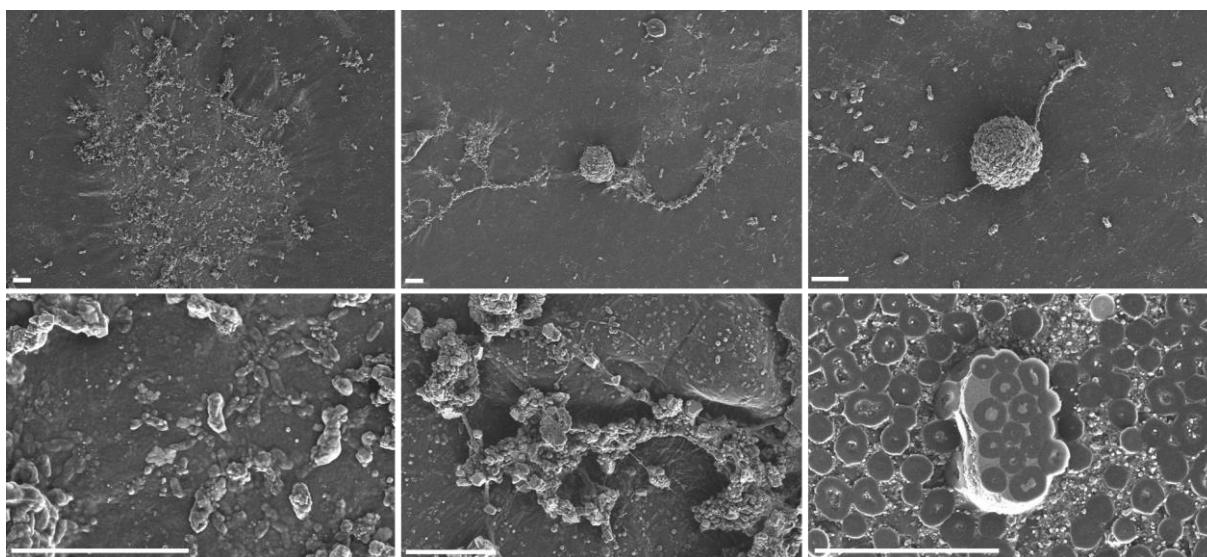

**Figure S3: Scanning electron microscopy images of the freshwater incubation medium after evaporation of water.** Images show microorganismal and non-microorganismal structures occurring in the freshwater incubation medium. Scale bars 10 $\mu$ m.

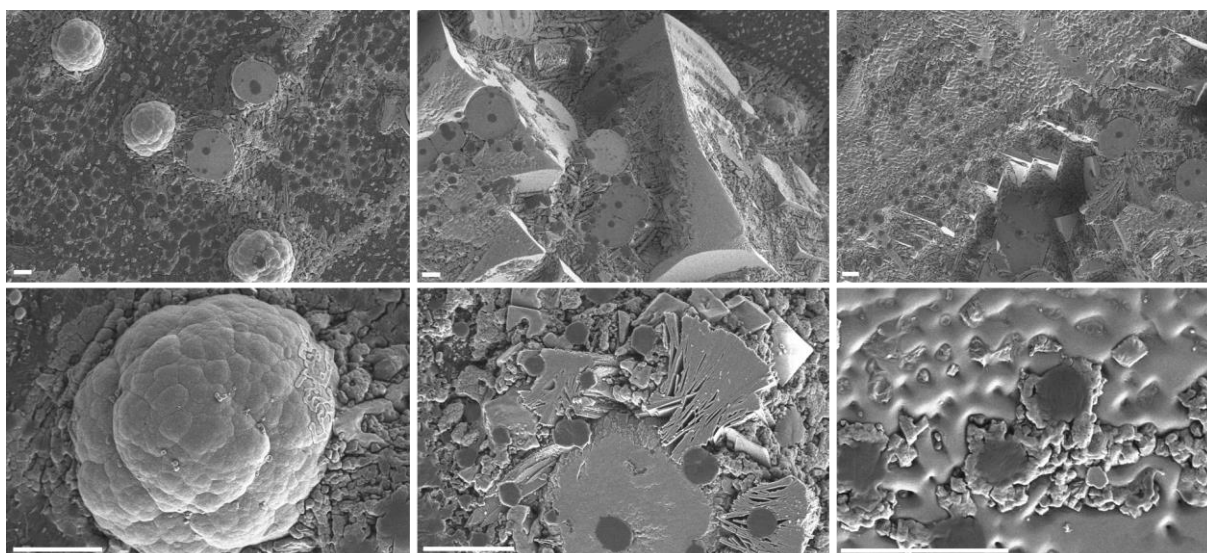

**Figure S4: Scanning electron microscopy images of the saltwater incubation medium after evaporation of water.** Images show microorganismal and non-microorganismal structures occurring in the freshwater incubation medium. Scale bars 10µm.
